# Supplementary material for: An Aluminum-Based Microfluidic Chip for Polymerase Chain Reaction Diagnosis
Source: Molecules. 2023 Jan 21;28(3):1085. doi: 10.3390/molecules28031085 (PMC9921548; doi:10.3390/molecules28031085)
Supplement: Supplementary file 1 [file molecules-28-01085-s001.zip › molecules-2155191-supplementary.pdf]

# An Aluminum-based Microfluidic Chip for Polymerase Chain Reaction Diagnosis

Siyu Yang <sup>1</sup>, Ziyi Zhang <sup>1</sup>, Qingyue Xian <sup>1</sup>, Qi Song <sup>2</sup>, Yiteng Liu <sup>1</sup>, Yibo Gao <sup>2</sup>, and Weijia Wen <sup>2,3,4,\*</sup>

## Supplementary Materials

**Table S1.** Information of primers and probes used in this study.

| Primers and probes | Sequences (5' to 3')              |
|--------------------|-----------------------------------|
| C-HBV2 Pb478       | 6-FAM-ACTCCCTCGCCTCGCAGACGA-BHQ-1 |
| C-HBV2 F382        | ACTCCTCCAGCTTATAGACCACCA          |
| C-HBV2 R518        | CGACGCGGCGATTGAGA                 |

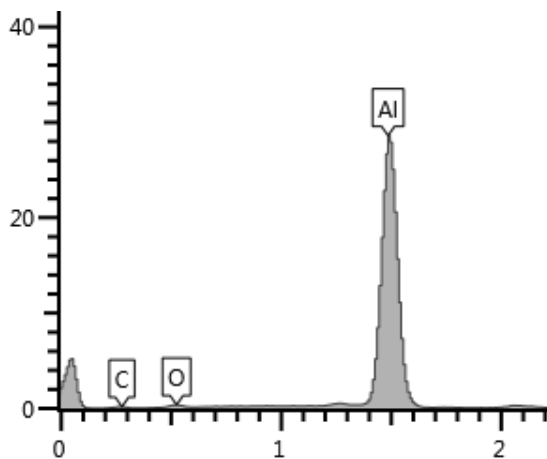

**Figure S1.** EDS map sum spectrum for the surface of chips before coating with silicone-modified epoxy resin.

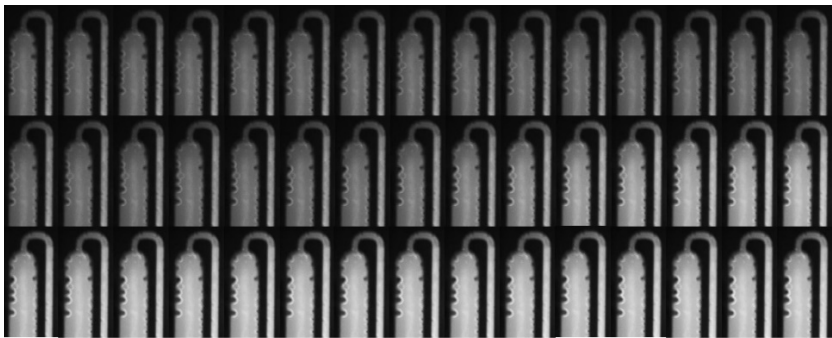

**Figure S2.** Fluorescent images from each cycle of the test in the aluminum-based chip.
